# Supplementary material for: Complexation of UO2(CO3)34−with Mg2+at varying temperatures and its effect on U(vi) speciation in groundwater and seawater
Source: Royal Society of Chemistry journal article supplement (doi:10.1039/c9dt03313k), 2019-01-01
Supplement: c9dt03313k1.pdf [file c9dt03313k1.pdf]

## Electronic Supplementary Information

### Complexation of $\text{UO}_2(\text{CO}_3)_3^{4-}$ with $\text{Mg}^{2+}$ at Varying Temperatures and Its Effect on U(VI) Speciation in Groundwater and Seawater

*Yongheum Jo<sup>†</sup>, Hee-Kyung Kim<sup>||</sup>, Jong-Il Yun<sup>\*,†</sup>*

<sup>†</sup>Department of Nuclear and Quantum Engineering, KAIST, 291 Daehak-ro, Yuseong-gu,  
Daejeon 34141, Republic of Korea

<sup>||</sup>Nuclear Chemistry Research Division, Korea Atomic Energy Research Institute, 111 Daedeok-  
daero 989 beon-gil, Yuseong-gu, Daejeon 34057, Republic of Korea

\*Corresponding Author : Jong-Il Yun (e-mail: [jiyun@kaist.ac.kr](mailto:jiyun@kaist.ac.kr))

Number of pages: 4

Number of tables: 2

## Details in U(VI) speciation

### U(VI) speciation in Mg<sup>2+</sup>-rich groundwater condition at 25 °C and 70 °C

Geochemical calculation was conducted by Phreeqc version 3<sup>1</sup> with NEA thermodynamic database<sup>2</sup> for Phreeqc (version 1 released in November 2018, <https://www.oecd-nea.org/dbtdb/tbdbdata/>). Analytical expressions based on isoelectric reactions<sup>3</sup> for ternary Ca-UO<sub>2</sub>-CO<sub>3</sub> U(VI) species and carbonato U(VI) species were added or revised to obtain temperature-dependent formation constants for the calculation. The analytical expression for magnesite (MgCO<sub>3</sub>) was taken from Phreeqc database 'sit.dat' based on ThermoChimie TDB<sup>4</sup> ([www.thermochimie-tdb.com](http://www.thermochimie-tdb.com)). The coefficients are listed in Table S1.

$$\log K(T) = A_1 + A_2 \cdot T + \frac{A_3}{T} + A_4 \cdot \log T + \frac{A_5}{T^2}$$

Analytical expression:

Table S1. Analytical expression for temperature-dependent formation constant

| $x \cdot Mg^{2+} + y \cdot UO_2^{2+} + z \cdot CO_3^{2-} \leftrightarrow Mg_x(UO_2)_y(CO_3)^{2x+2y-2z}$ |                |                |                |                |                |
|---------------------------------------------------------------------------------------------------------|----------------|----------------|----------------|----------------|----------------|
| (xyz)                                                                                                   | A <sub>1</sub> | A <sub>2</sub> | A <sub>3</sub> | A <sub>4</sub> | A <sub>5</sub> |
| (011)                                                                                                   | 444.5811999    | 8.39388E-02    | -28047.08816   | -1.57793E+02   | 2.20870E+06    |
| (012)                                                                                                   | 453.6162869    | 8.39388E-02    | -28752.23886   | -1.57793E+02   | 2.20870E+06    |
| (013)                                                                                                   | 448.7377297    | 8.39388E-02    | -25738.37253   | -1.57793E+02   | 2.20870E+06    |
| (113)                                                                                                   | 887.5214104    | 1.67878E-01    | -53780.23735   | -3.15586E+02   | 4.41739E+06    |
| Magnesite<br>(nat)                                                                                      | -1.31654E+1    | 0              | 1.26875E+3     | 0              | 0              |

### Simulation of U(VI) extraction from seawater

Simulation of U(VI) complexations with glutarimidodioxime<sup>5</sup> and glutardiamidoxime<sup>6</sup> in seawater was calculated by Visual MINTEQ ver 3.1.<sup>7</sup> Chemical thermodynamic data except for ternary Mg/Ca-UO<sub>2</sub>-CO<sub>3</sub> and U(VI)-ligands complexations were obtained from NEA TDB.<sup>2</sup> Formation constants of most U(VI) species at 0.5 M NaCl was calculated based on specific ion theory (SIT).<sup>8</sup> Ion interaction coefficients for SIT were taken from NEA TDB<sup>2</sup>, preferentially.

Ion interaction coefficients for Mg/Ca-UO<sub>2</sub>-CO<sub>3</sub> was taken from PSI Nagra TDB<sup>9</sup> as described in this work. For the minor U(VI) species whose coefficients were not selected in TDB, Davies equation<sup>10</sup> was applied to obtain the formation constants at 0.5 M ionic strength. The data of U(VI)-ligands were used as determined at 0.5 M NaCl in previous works. Complexations of glutarimidedioxime with Mg<sup>2+</sup> and Ca<sup>2+</sup> were also considered in this simulation based on the data in previous work.<sup>11</sup>

The temperature effect on ion interaction coefficients was assumed to be negligible. In case seven U(VI) species (UO<sub>2</sub>CO<sub>3</sub>(aq), UO<sub>2</sub>(CO<sub>3</sub>)<sub>2</sub><sup>2-</sup>, UO<sub>2</sub>(CO<sub>3</sub>)<sub>3</sub><sup>4-</sup>, (UO<sub>2</sub>)<sub>3</sub>(CO<sub>3</sub>)<sub>6</sub><sup>6-</sup>, CaUO<sub>2</sub>(CO<sub>3</sub>)<sub>3</sub><sup>2-</sup>, Ca<sub>2</sub>UO<sub>2</sub>(CO<sub>3</sub>)<sub>3</sub>(aq), and MgUO<sub>2</sub>(CO<sub>3</sub>)<sub>3</sub><sup>2-</sup>), the temperature-dependent formation constants were obtained based on isoelectric reactions<sup>3</sup> as suggested in previous<sup>12</sup> and this work. The corrected formation constants are summarized in Table S2.

Table S2. Formation constants at 10, 25, and 40 C for U(VI) simulation.

| Reaction                                                                                                                                                     | log β' @ I = 0.5 M NaCl |       |       |
|--------------------------------------------------------------------------------------------------------------------------------------------------------------|-------------------------|-------|-------|
|                                                                                                                                                              | 25 °C                   | 10 °C | 40 °C |
| UO <sub>2</sub> <sup>2+</sup> + CO <sub>3</sub> <sup>2-</sup> ↔ UO <sub>2</sub> (CO <sub>3</sub> )(aq)                                                       | 8.60                    | 8.62  | 8.63  |
| UO <sub>2</sub> <sup>2+</sup> + 2CO <sub>3</sub> <sup>2-</sup> ↔ UO <sub>2</sub> (CO <sub>3</sub> ) <sub>2</sub> <sup>2-</sup>                               | 15.24                   | 15.14 | 15.39 |
| UO <sub>2</sub> <sup>2+</sup> + 3CO <sub>3</sub> <sup>2-</sup> ↔ UO <sub>2</sub> (CO <sub>3</sub> ) <sub>3</sub> <sup>4-</sup>                               | 21.83                   | 22.23 | 21.53 |
| 3UO <sub>2</sub> <sup>2+</sup> + 6CO <sub>3</sub> <sup>2-</sup> ↔ (UO <sub>2</sub> ) <sub>3</sub> (CO <sub>3</sub> ) <sub>6</sub> <sup>6-</sup>              | 53.89                   | 54.59 | 53.46 |
| Ca <sup>2+</sup> + UO <sub>2</sub> <sup>2+</sup> + 3CO <sub>3</sub> <sup>2-</sup> ↔<br>CaUO <sub>2</sub> (CO <sub>3</sub> ) <sub>3</sub> <sup>2-</sup>       | 24.31                   | 24.83 | 23.96 |
| 2Ca <sup>2+</sup> + UO <sub>2</sub> <sup>2+</sup> + 3CO <sub>3</sub> <sup>2-</sup> ↔<br>Ca <sub>2</sub> UO <sub>2</sub> (CO <sub>3</sub> ) <sub>3</sub> (aq) | 26.42                   | 26.51 | 26.05 |
| Mg <sup>2+</sup> + UO <sub>2</sub> <sup>2+</sup> + 3CO <sub>3</sub> <sup>2-</sup> ↔<br>MgUO <sub>2</sub> (CO <sub>3</sub> ) <sub>3</sub> <sup>2-</sup>       | 23.33                   | 23.79 | 23.02 |

Using the default setting of MINTEQ,<sup>7</sup> van't Hoff equation was applied to obtain formation constants of the U(VI) species whose molar reaction enthalpy has been selected in NEA TDB.<sup>2</sup> For the minor U(VI) species whose enthalpy data has not been reported yet, the temperature effect was assumed to be negligible.

1. D. L. Parkhurst and C. Appelo, *Description of input and examples for PHREEQC version 3: a computer program for speciation, batch-reaction, one-dimensional transport, and inverse geochemical calculations*, Report 2328-7055, US Geological Survey, Denver, 2013.
2. R. Guillaumont, T. Fanghänel, J. Fuger, I. Grenthe, V. Neck, D. A. Palmer and M. H. Rand, *Chemical Thermodynamics vol. 5, Update on the Chemical Thermodynamics of Uranium, Neptunium, Plutonium, Americium and Technetium*, Elsevier, Amsterdam, 2003.
3. I. Puigdomenech, J. A. Rard, A. V. Plyasunov and I. Grenthe, *Modelling in aquatic chemistry, Chapter X Temperature Corrections to Thermodynamic data and Enthalpy Calculations*, OECD Publishing, Paris, 1997.
4. E. Giffaut, M. Grivé, Ph. Blanc, Ph. Vieillard, E. Colàs, H. Gailhanou, S. Gaboreau, N. Marty, B. Madé and L. Duro, *Applied Geochemistry*, 2014, **49**, 225-236.
5. G. Tian, S. J. Teat, Z. Zhang and L. Rao, *Dalton Transactions*, 2012, **41**, 11579-11586.
6. G. Tian, S. J. Teat and L. Rao, *Dalton Transactions*, 2013, **42**, 5690-5696.
7. J. P. Gustafsson, *Visual MINTEQ version 3.1*, Stockholm, 2014.
8. L. Ciavatta, *Annali di Chimica (Rome)*, 1980, **70**, 551-567.
9. T. Thoenen, W. Hummel, U. Berner and E. Curti, *The PSI/Nagra Chemical Thermodynamic Database 12/07*, Paul Scherrer Institut, Villigen, 2014.
10. C. W. Davies, *Ion association*, Butterworths, Washington D.C., 1962.
11. C. J. Leggett and L. Rao, *Polyhedron*, 2015, **95**, 54-59.
12. Y. Jo, A. Kirishima, S. Kimuro, H.-K. Kim and J.-I. Yun, *Dalton Transactions*, 2019, **48**, 6942-6950.

## References
